# Supplementary material for: Experimental mapping of DNA duplex shape enabled by global lineshape analyses of a nucleotide-independent nitroxide probe
Source: PubMed Central journal article supplement — Nucleic Acids Res. 2014 Aug 4;42(18):e140. doi: 10.1093/nar/gku695 (PMC4191381; doi:10.1093/nar/gku695), 2014-08-04
Supplement: supp_gku695_SI_revised_gku695.pdf [file supp_gku695_SI_revised_gku695.pdf]

## Supplementary Data

### **Experimental mapping of DNA duplex shape enabled by global lineshape analyses of a nucleotide-independent nitroxide probe**

Yuan Ding, Xiaojun Zhang, Kenneth W. Tham and Peter Z. Qin\*

Departments of Chemistry, University of Southern California, Los Angeles, CA 90089

\*Corresponding author: LJS 251, 840 Downey Way, Los Angeles, CA 90089. Tel: (213) 821-2461; Fax: (213) 740-0930; Email: [pzq@usc.edu](mailto:pzq@usc.edu)

**Table S1:** DNA oligonucleotides used in this study.

| Sequence name            | Sequence                                                                                                     | Extinction coefficient<br>( $M^{-1} \cdot cm^{-1}$ ) |
|--------------------------|--------------------------------------------------------------------------------------------------------------|------------------------------------------------------|
| BAX-labeled strand       | 5'-T C A C A A G T T A g A G A C A A G C C T-3'<br><small>p p p p p p p p p p p p p p p p p p</small>        | 211,400                                              |
| BAX-complementary strand | 5'-biotin-A G G C T T G T C T c T A A C T T G T G A-3'<br><small>p p p p p p p p p p p p p p p p p p</small> | 197,700                                              |
| p21-labeled strand       | 5'-G A A C A T G T C C C A A C A T G T T G-3'<br><small>p p p p p p p p p p p p p p p p p p</small>          | 194,900                                              |
| p21-complementary strand | 5'-biotin-C A A C A T G T T G G A C A T G T T C-3'<br><small>p p p p p p p p p p p p p p p p p p</small>     | 192,700                                              |

**Table S2:** Key for spectral number in the P-matrix.

| Spectral Number | DNA Site | $P_{\text{TEMPOL}}$ | di-nucleotide step |
|-----------------|----------|---------------------|--------------------|
| 1               | BAX_9    | 0.575               | TpT                |
| 2               | BAX_15   | 0.555               | ApC                |
| 3               | p21_6    | 0.554               | ApT                |
| 4               | BAX_4    | 0.543               | ApC                |
| 5               | p21_16   | 0.540               | ApT                |
| 6               | p21_8    | 0.535               | GpT                |
| 7               | p21_11   | 0.531               | CpC                |
| 8               | p21_9    | 0.530               | TpC                |
| 9               | BAX_13   | 0.529               | ApG                |
| 10              | BAX_11   | 0.526               | ApG                |
| 11              | BAX_8    | 0.523               | GpT                |
| 12              | p21_4    | 0.520               | ApC                |
| 13              | p21_14   | 0.520               | ApC                |
| 14              | BAX_6    | 0.517               | ApA                |
| 15              | BAX_10   | 0.515               | TpA                |
| 16              | p21_7    | 0.514               | TpG                |
| 17              | p21_10   | 0.514               | CpC                |
| 18              | p21_18   | 0.511               | GpT                |
| 19              | p21_13   | 0.510               | ApA                |
| 20              | BAX_7    | 0.509               | ApG                |
| 21              | BAX_14   | 0.504               | GpA                |
| 22              | p21_5    | 0.502               | CpA                |
| 23              | BAX_18   | 0.502               | ApG                |
| 24              | BAX_17   | 0.500               | ApA                |
| 25              | p21_17   | 0.499               | TpG                |
| 26              | p21_12   | 0.495               | CpA                |
| 27              | BAX_12   | 0.492               | GpA                |
| 28              | BAX_19   | 0.491               | GpC                |
| 29              | BAX_16   | 0.488               | CpA                |
| 30              | BAX_5    | 0.484               | CpA                |
| 31              | p21_15   | 0.472               | CpA                |

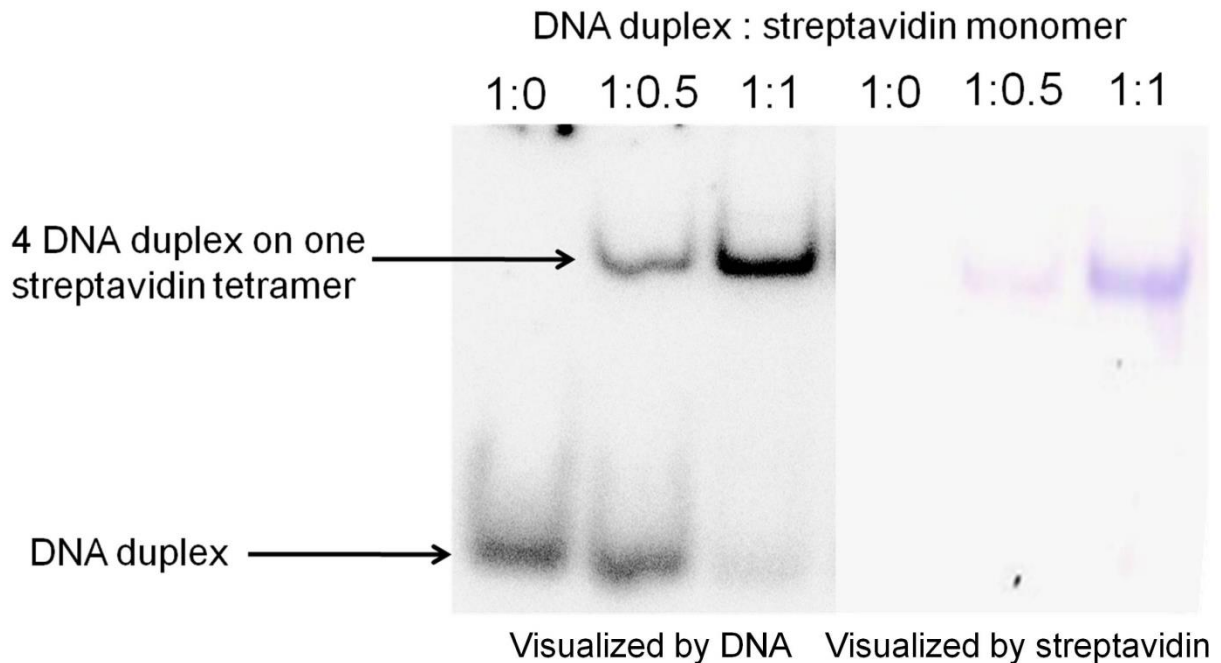

**Figure S1:** DNA tethering to streptavidin examined by a native gel shift assay. In each sample, 40  $\mu\text{M}$  of DNA duplex was mixed with traced amount of  $^{32}\text{P}$  labeled DNA duplex, then incubated with streptavidin in 50 mM HEPES (pH 7.5), 100 mM NaCl, and 5 mM  $\text{MgCl}_2$ . The samples were loaded onto a 8% native polyacrylamide gel that was prepared in a buffer containing 50 mM HEPES, pH 7.5, 100 mM NaCl, 5 mM  $\text{MgCl}_2$ , and 89 mM boric acid. The gel was run in the same buffer at 4°C, and was visualized by both phosphorimaging (left) and Coomassie Blue staining (right). The data show that with increasing concentration of streptavidin, one DNA-streptavidin complex is formed. This species was assigned as DNA tethered to a streptavidin tetramer, as previous studies reported that streptavidin exists as tetramer when bound to biotin under similar conditions (1).

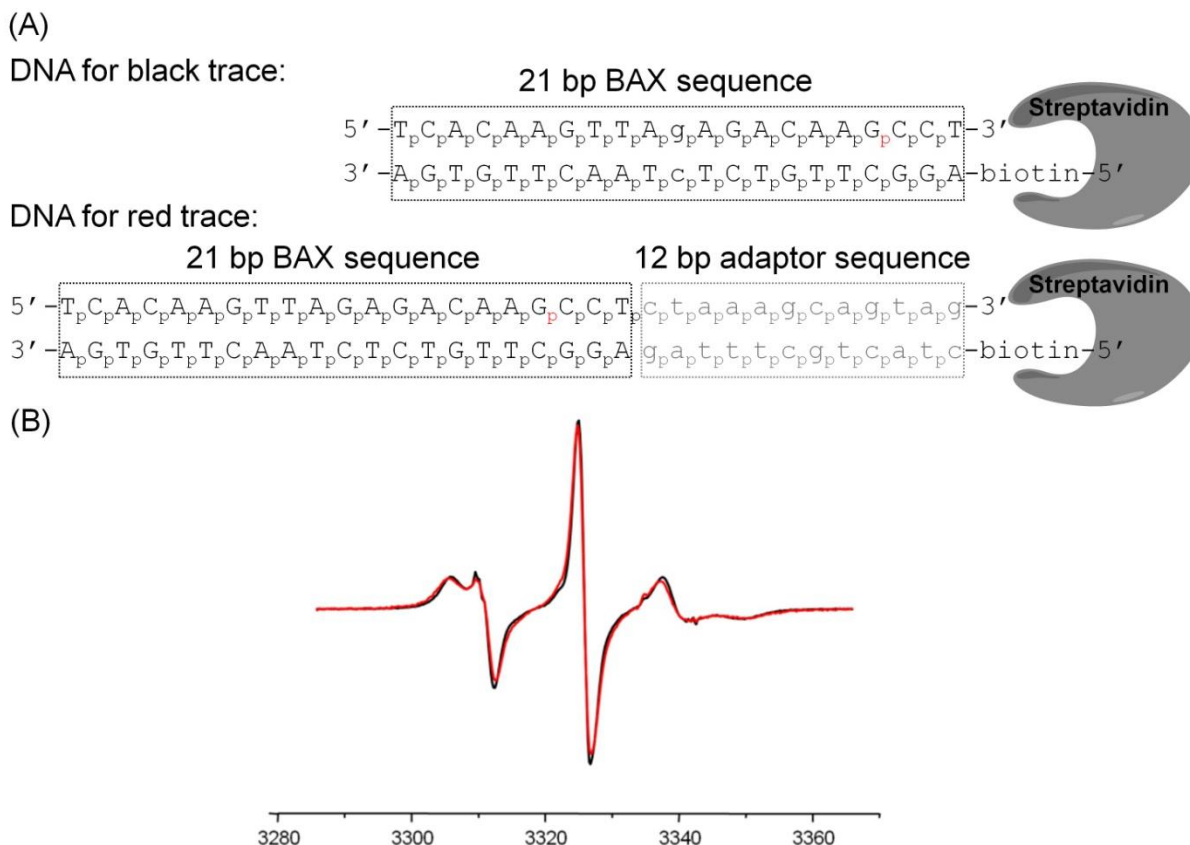

**Figure S2:** Examining spectral effects due to altering the relative positioning between the R5a labeling site and streptavidin. Two EPR spectra of streptavidin tethered BAX\_19 are shown. The black trace was obtained with 21-bp BAX duplex tethered directly to streptavidin (panel (A), top), in which case the R5a label at the BAX\_19 site was closest to the tethering point and expected to have the highest probability to contact streptavidin. The red trace was obtained with a 12 base-pair adaptor sequence (gray, lower case) placed in between the BAX duplex and streptavidin (panel (A) bottom), which placed the BAX\_19 site further away from the streptavidin and was expected to eliminate/reduce R5a-streptavidin contacts. The two spectra show identical lineshape, with a pair-wise Pearson coefficient of 0.993. This indicates that R5a spectrum was not affected upon changing the relative location between R5a and streptavidin, indicating a lack of direct R5a-streptavidin contacts.

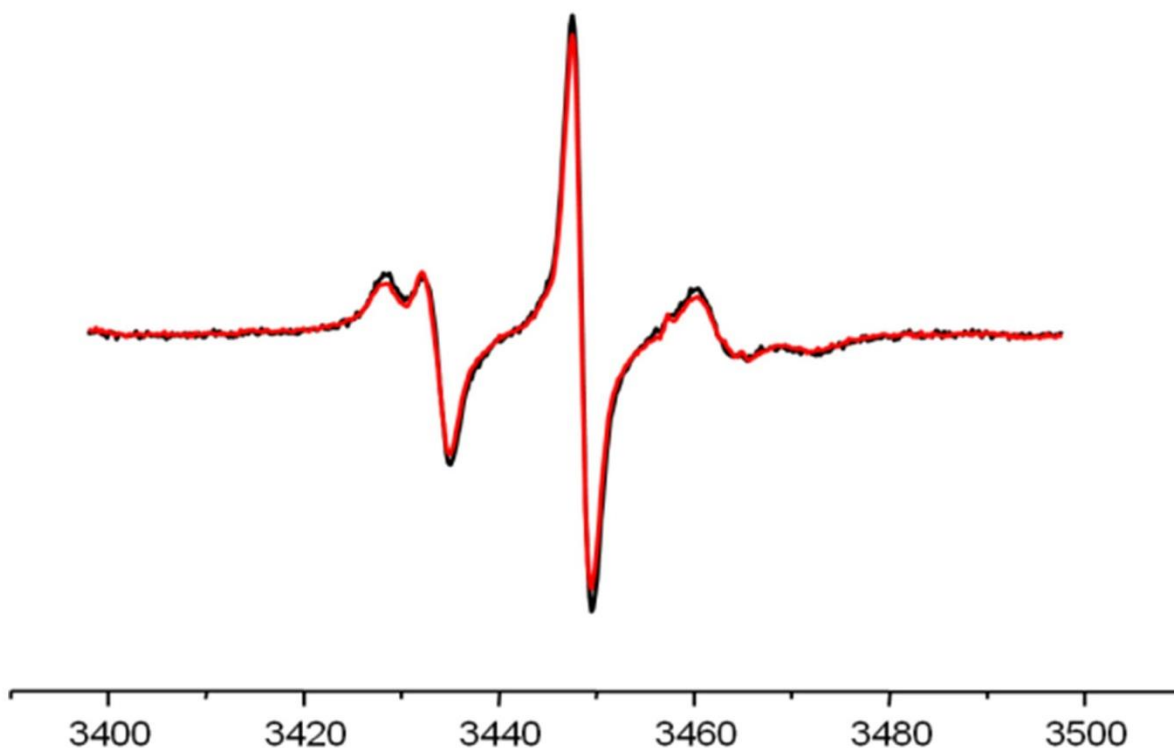

**Figure S3:** Assessing potential inter-molecular di-polar interaction in the streptavidin tethered DNAs. Two streptavidin tethered p21\_18 spectra were compared. The black trace was obtained from a sample in which 100% of the p21 duplex was labeled with R5a, while the red trace was obtained in which 20% of the p21 duplex was labeled. No broadening was observed when comparing the 100% labeled sample to that of 20% labeled. The pair-wise  $P$  was calculated to be 0.999. This indicates that inter-molecular di-polar interaction minimally affects the observed spectral lineshape under our experiment conditions.

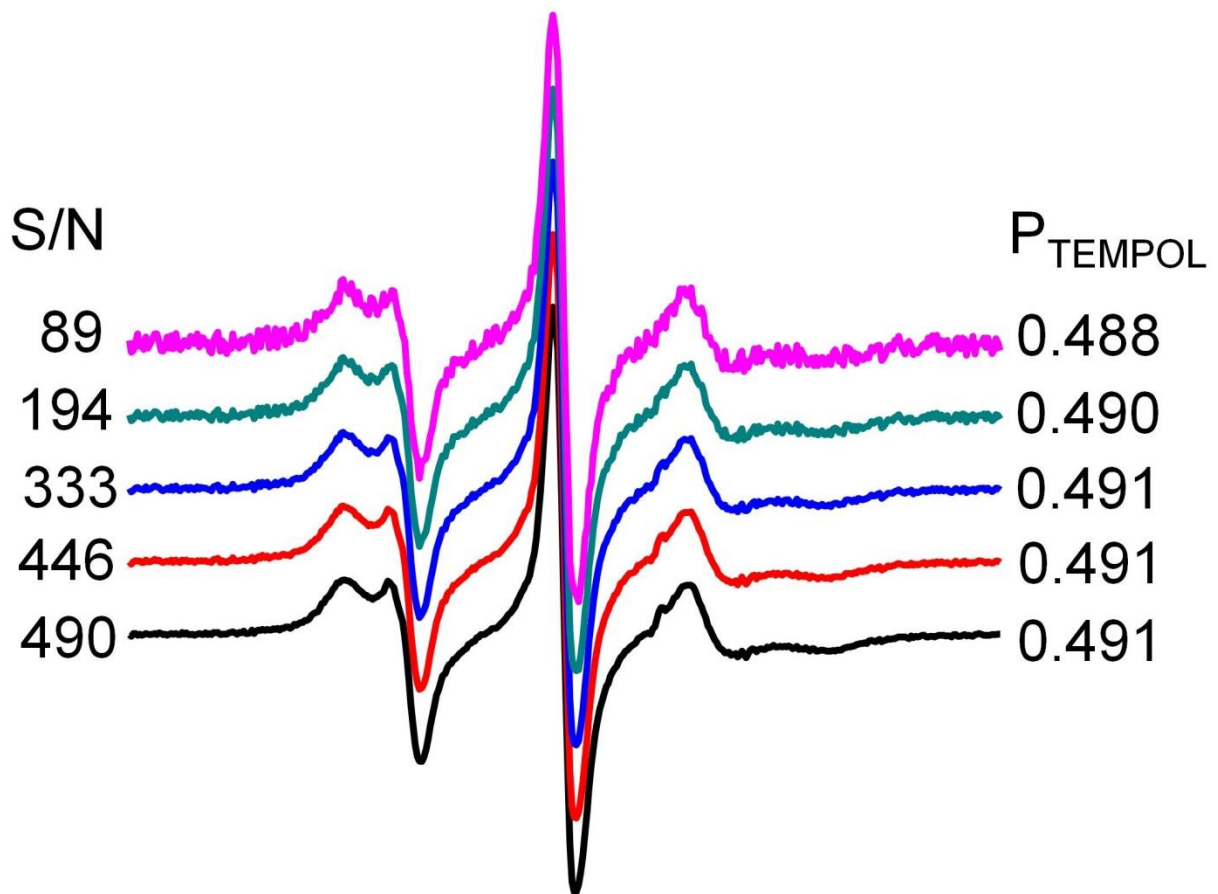

**Figure S4:** Examining the impact of noise on Pearson coefficient. Various amount of random noise was added to the measured BAX\_19 spectrum, and then the  $P_{TEMPOL}$  values were computed. For signal-to-noise (S/N) ratio > 300, no change in  $P_{TEMPOL}$  was observed.

Before normalization

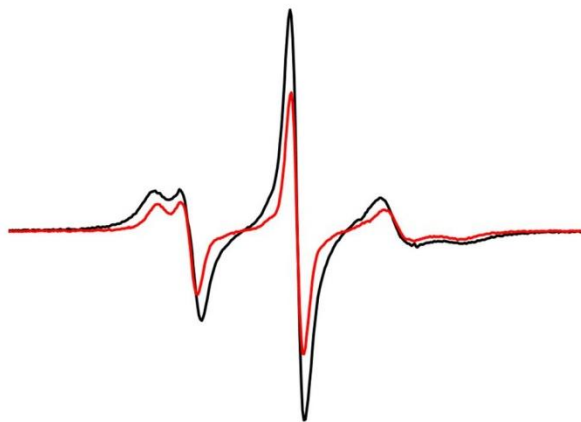

P: 0.972

RMSD:  $8.86 \times 10^{-2}$

After normalization

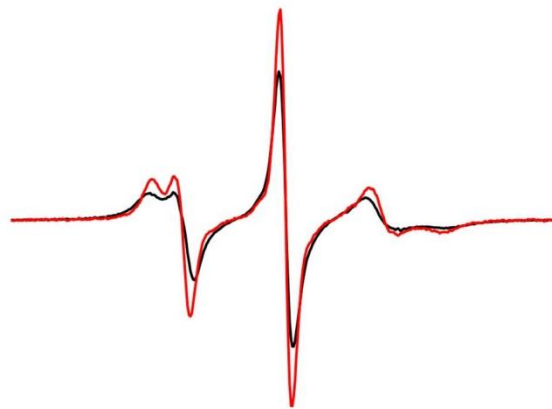

P: 0.972

RMSD:  $1.09 \times 10^{-4}$

**Figure S5:** Sensitivity of Pearson coefficient and RMSD on spectra normalization. Two spectra plotted here are BAX\_17 (black trace) and BAX\_10 (red trace) for both before and after normalization.  $P(\text{BAX}_{17}/\text{BAX}_{10})$  remains unchanged upon spectral normalization, while the RMSD value changes drastically.



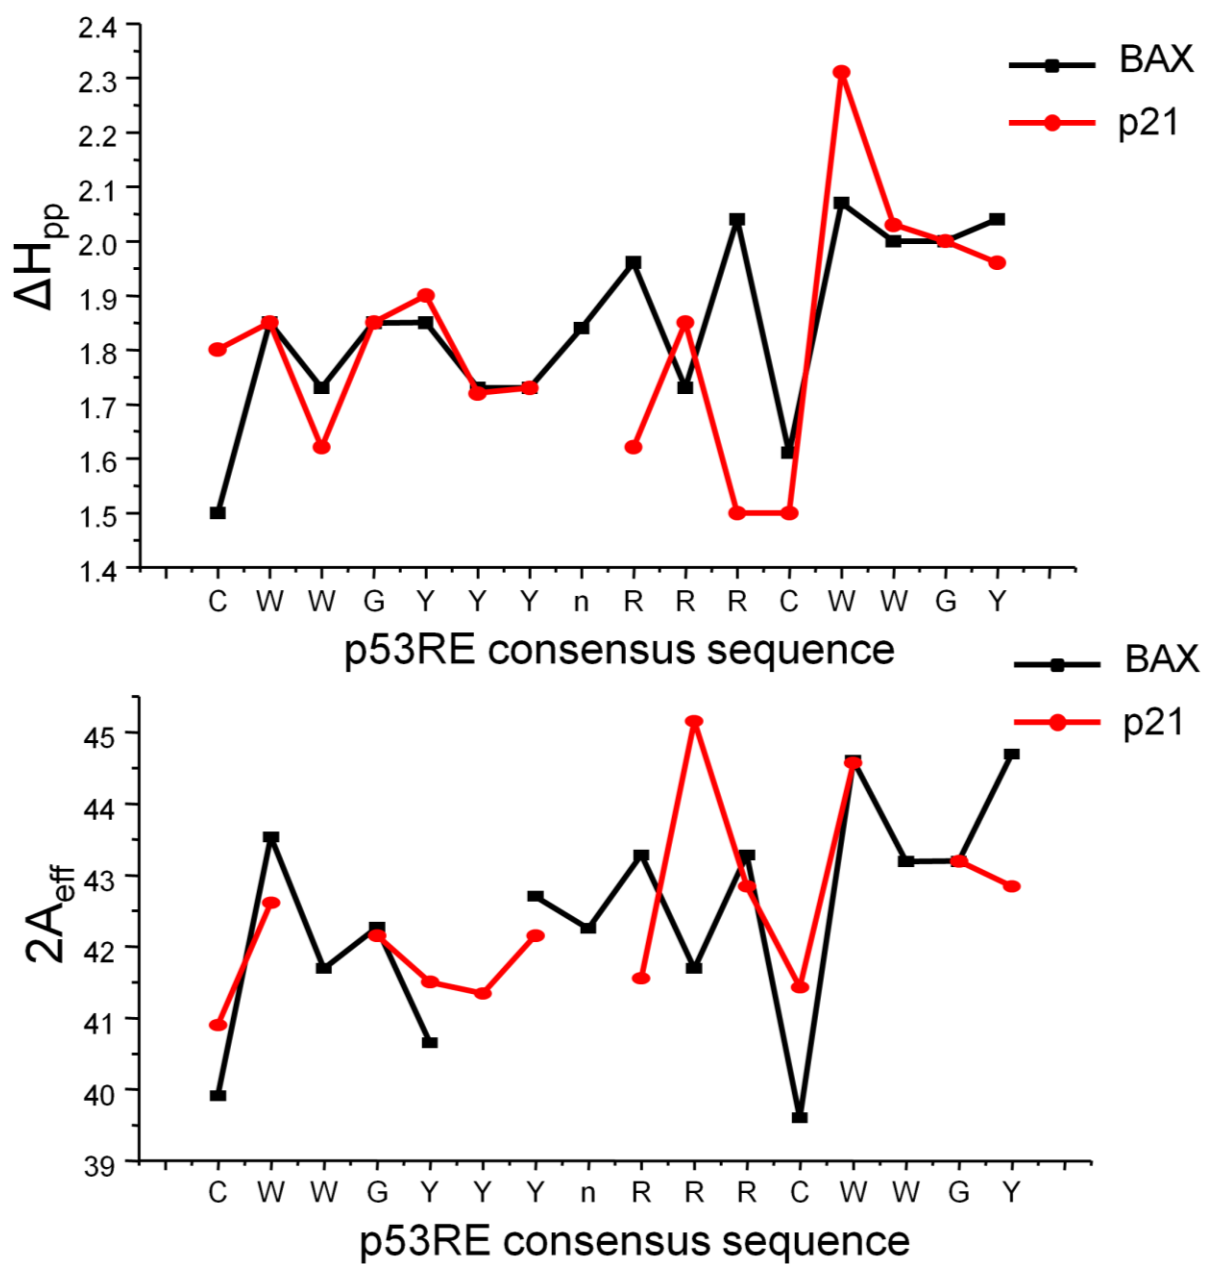

**Figure S6:** Map of central line width ( $\Delta H_{pp}$ ) (top panel) and effective hyperfine splitting ( $2A_{eff}$ ) (bottom panel) in the BAX (black) and p21 (red) duplexes.

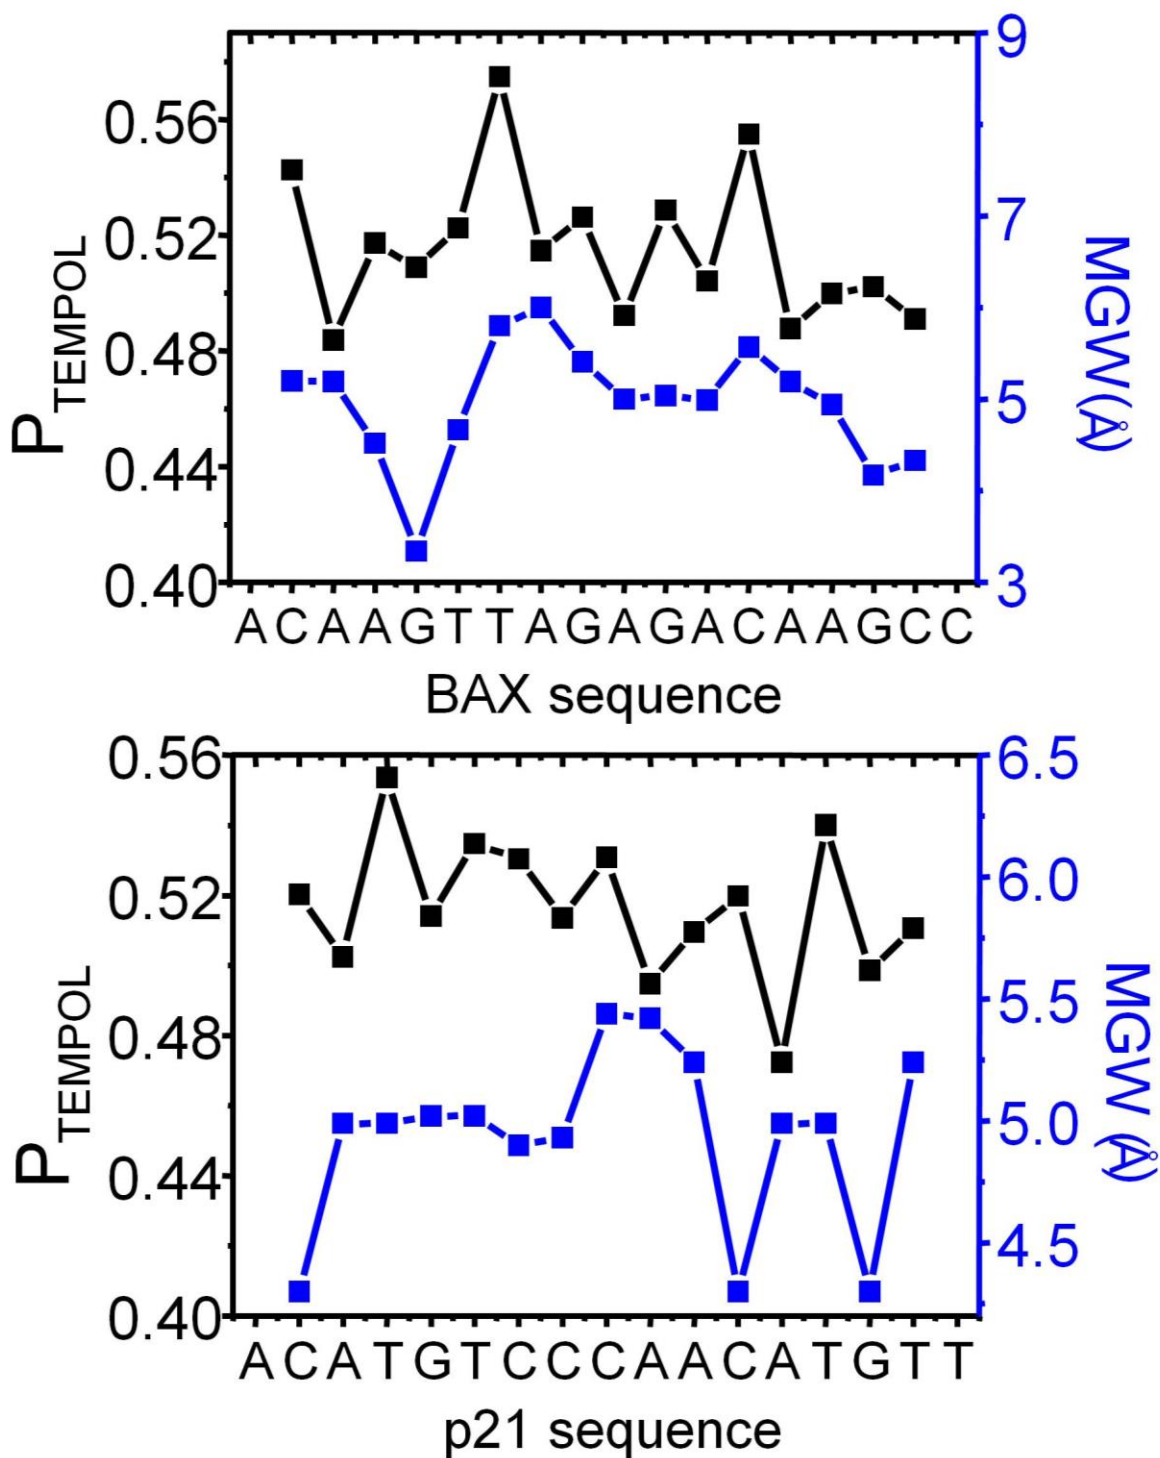

**Figure S7:** Comparisons between maps of  $P_{TEMPOL}$  (black) and minor groove width (MGW, blue) for BAX (top panel) and p21 (bottom panel).  $P_{TEMPOL}$  value was aligned to the MGW value for the base-pair 3' of the spin label. Pearson coefficients between the two maps were 0.419 and 0.007, respectively, for BAX and p21.

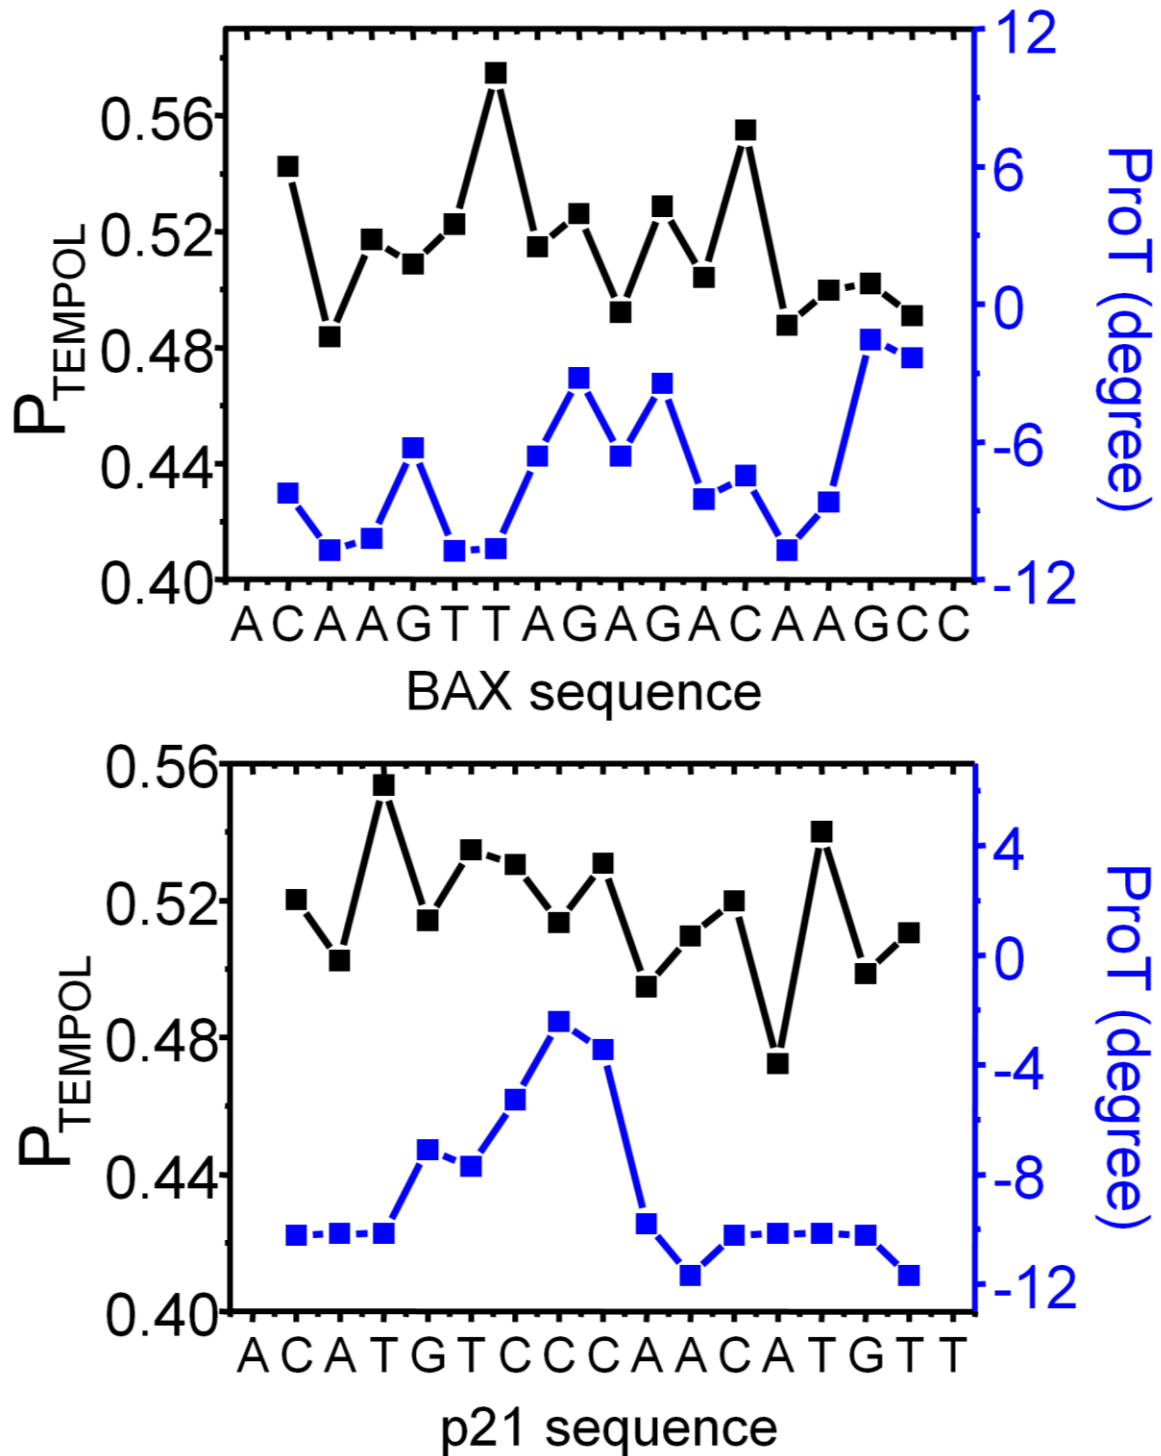

**Figure S8:** Comparisons between maps of  $P_{TEMPOL}$  (black) and propeller twist (ProT, blue) for BAX (top panel) and p21 (bottom panel).  $P_{TEMPOL}$  value was aligned with the ProT value for the base-pair 3' of the spin label. Pearson coefficients between the two maps were -0.124 and 0.237, respectively, for BAX and p21.



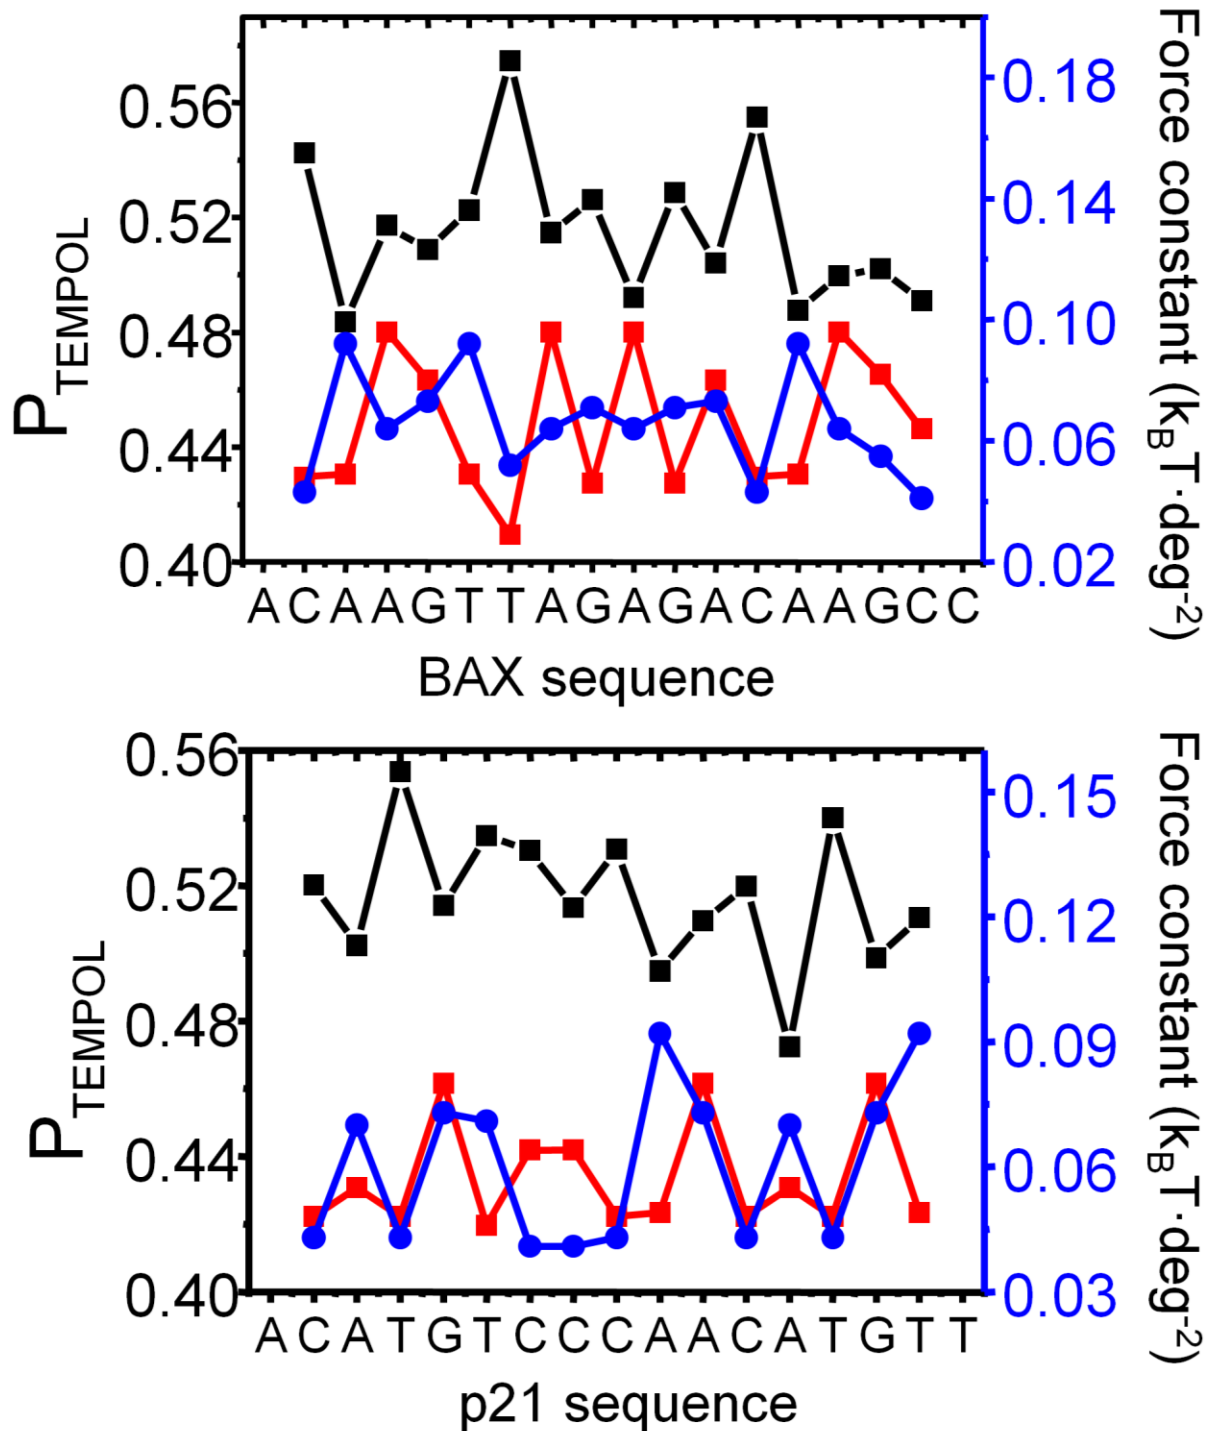

**Figure S10:** Comparisons between maps of  $P_{TEMPOL}$  (black), Roll-Roll force constant (red), and HeIT-HeIT force constant (blue) for BAX (top panel) and p21 (bottom panel). The force constants were obtained from reference (2).  $P_{TEMPOL}$  value was aligned to the force constant for the base-pair step 3' of the spin-labeled phosphate. For BAX, Pearson coefficients were -0.517 and -0.456, respectively, for  $P_{TEMPOL}$ /Roll-Roll and  $P_{TEMPOL}$ /HeIT-HeIT. For p21, they were -0.314 and -0.599, respectively.

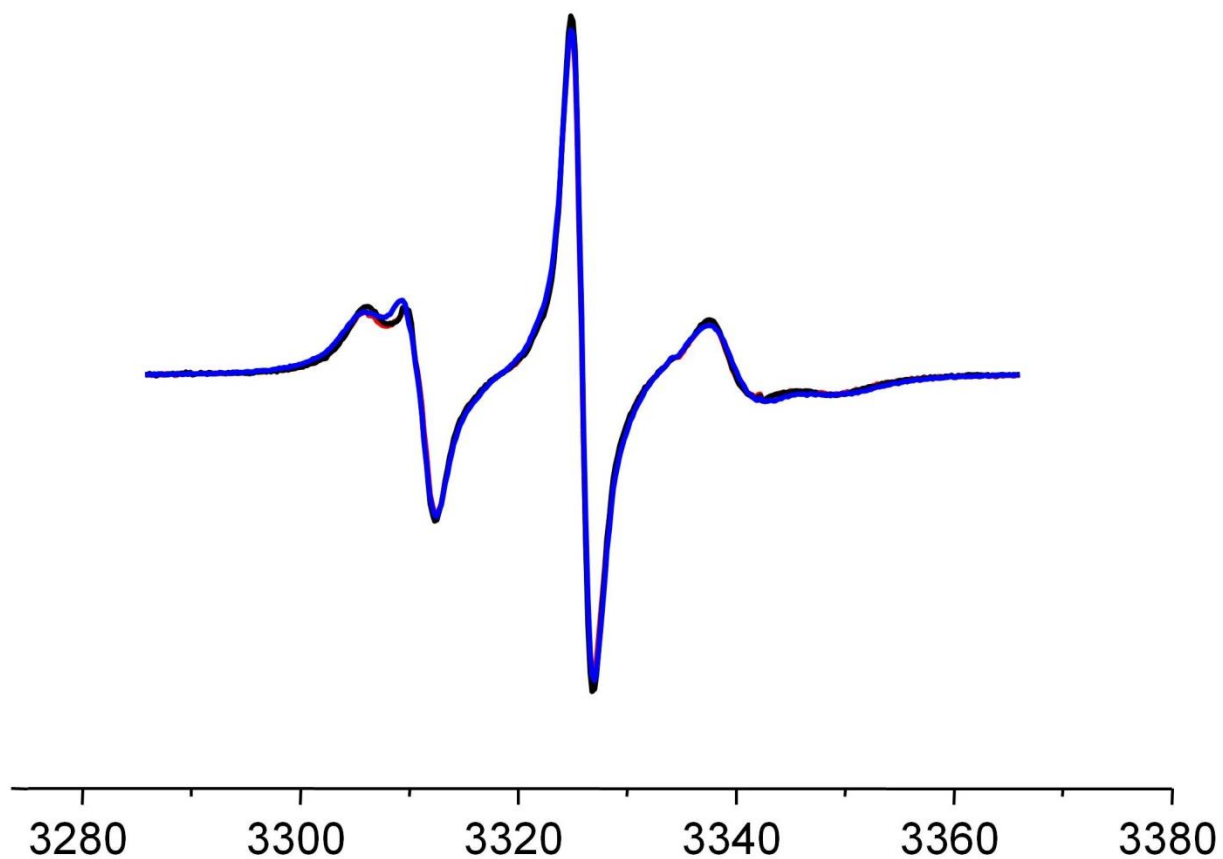

**Figure S11:** Overlay of spectra that showed a high degree of similarity in the P-matrix (main text Figure 6). Black: spectrum 23 (BAX\_18); Red: spectrum 24 (BAX\_17); Blue: spectrum 25 (p21\_17). The pair-wise P values among these three spectra were  $P(\text{BAX\_17/BAX\_18})$ : 0.999;  $P(\text{BAX\_18/p21\_17})$ : 0.998; and  $P(\text{BAX\_17/p21\_17})$ : 0.998.

References:

1. Sano, T. and Cantor, C.R. (1995) Intersubunit contacts made by tryptophan 120 with biotin are essential for both strong biotin binding and biotin-induced tighter subunit association of streptavidin. *Proc Natl Acad Sci U S A*, **92**, 3180-3184.
2. Olson, W.K., Gorin, A.A., Lu, X.J., Hock, L.M. and Zhurkin, V.B. (1998) DNA sequence-dependent deformability deduced from protein-DNA crystal complexes. *Proc Natl Acad Sci U S A*, **95**, 11163-11168.
